# Supplementary material for: Controlled feeding trials with ungulates: a new application of in vivo dental molding to assess the abrasive factors of microwear
Source: Oxford University Press journal article supplement (doi:10.1242/jeb.118406), 2015-01-01
Supplement: jeb118406supp.pdf [file jeb118406supp.pdf]

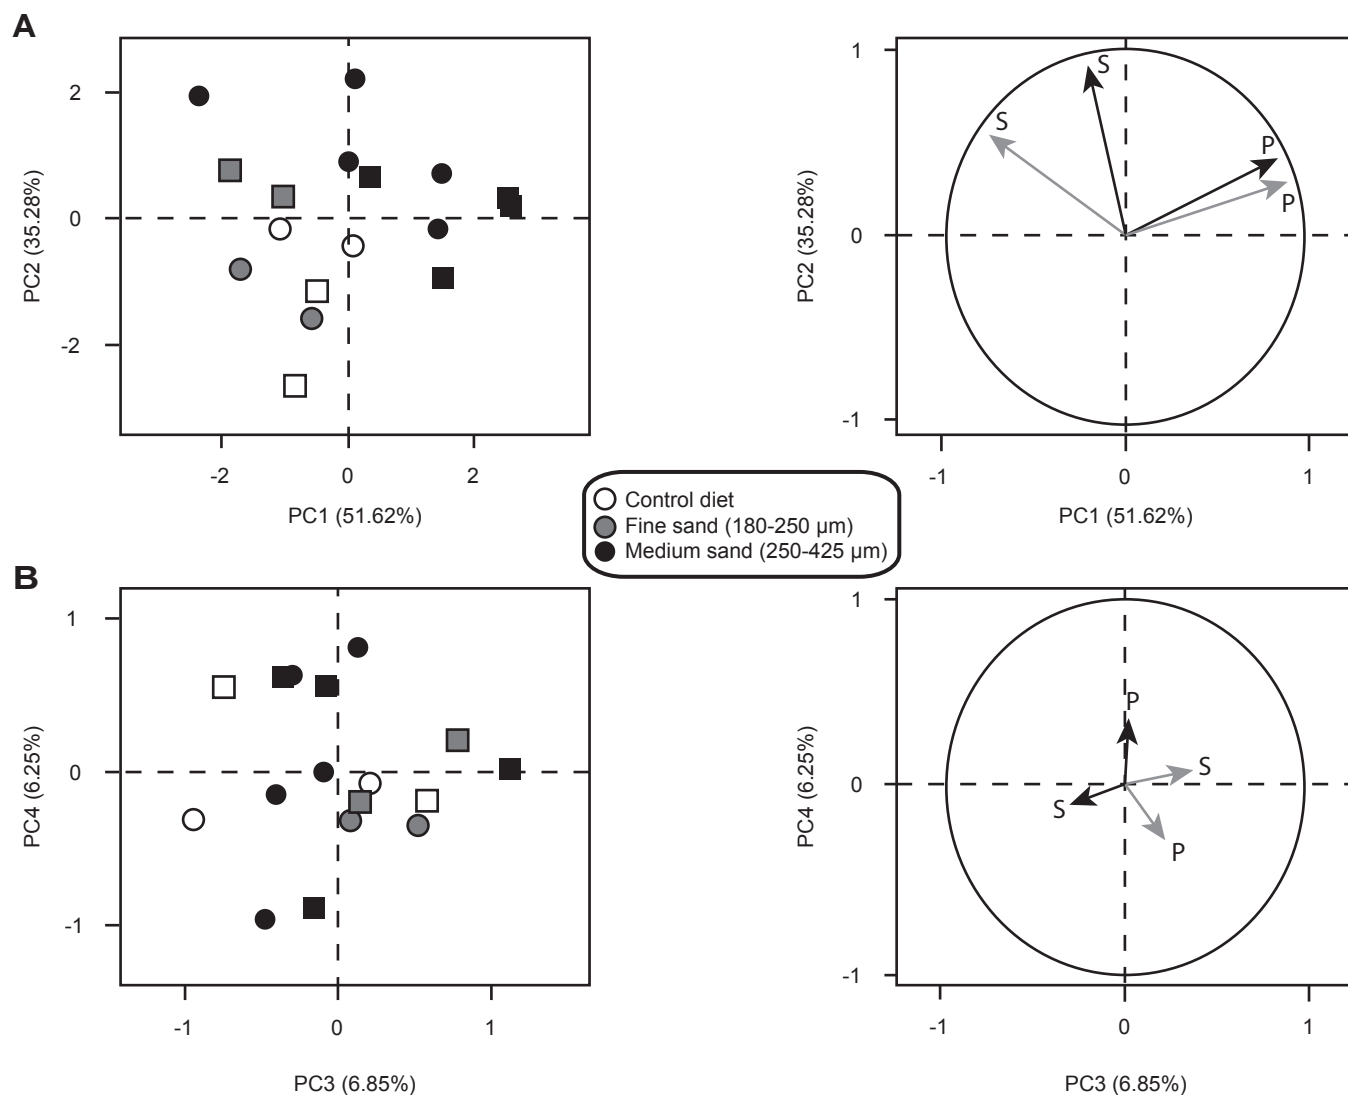

**Figure S1. Bivariate plots and eigenvectors showing variation among diets (control, fine sand, and medium sand) for sheep 1 and 2. A) Principal components 1 (pits) and 2 (scratches) and B) principal components 3 and 4 (observer bias). Black arrows=Observer 1; grey arrows=Observer 2; S=total scratches; P=total pits; different shapes represent different subjects; different colors represent different diets.**

**Table S1. Analysis of Variance results for extracted principal components 1 and 2 from sheep 1 and sheep 2 with Tukey comparisons for assessing differences among diet treatments.**

| Principal Component 1 - Pits (O1P+O2P) |    |       |      |         |       | Principal Component 2 - Scratches (O1S+O2S) |    |       |       |         |       |
|----------------------------------------|----|-------|------|---------|-------|---------------------------------------------|----|-------|-------|---------|-------|
| Source                                 | df | SS    | MS   | F-ratio | P     | Source                                      | df | SS    | MS    | F-ratio | P     |
| Diet                                   | 2  | 4,391 | 2195 | 9.035   | 0.003 | Diet                                        | 2  | 141.2 | 70.60 | 0.963   | 0.406 |
| Residual                               | 14 | 3,402 | 243  |         |       | Residual                                    | 14 | 1,026 | 73.28 |         |       |

  

| Tukey Multiple Comparisons of Means |  | P adj. | Tukey Multiple Comparisons of Means |  | P adj. |
|-------------------------------------|--|--------|-------------------------------------|--|--------|
| Control-Fine                        |  | 0.982  | Control-Fine                        |  | 0.990  |
| Control-Medium                      |  | 0.013  | Control-Medium                      |  | 0.567  |
| Fine-Medium                         |  | 0.009  | Fine-Medium                         |  | 0.474  |

Control=control diet (hay with no added silica); Fine=fine-grained sand treatment (180-250 μm); Medium=medium-grained sand treatment (250-425 μm).
